# Supplementary material for: Antiproliferative Activity on Human Colon Adenocarcinoma Cells and In Vitro Antioxidant Effect of Anthocyanin-Rich Extracts from Peels of Species of the Myrtaceae Family
Source: PubMed Central journal article supplement (PMC7865521; doi:10.3390/molecules26030564), 2021-01-22
Supplement: molecules-26-00564-s001.pdf [file molecules-26-00564-s001.pdf]

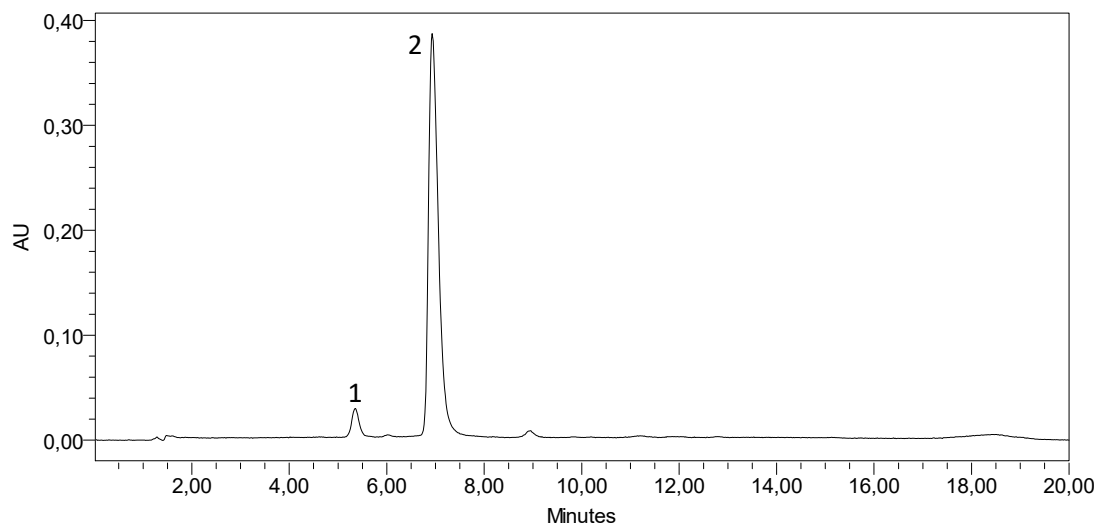

**Figure S1.** Chromatogram obtained from jaboticaba (*Myrciaria jaboticaba*, MJ) samples. Peak 1: Delphinidin-3-O- glucoside; peak 2: Cyanidin-3-O- glucoside.

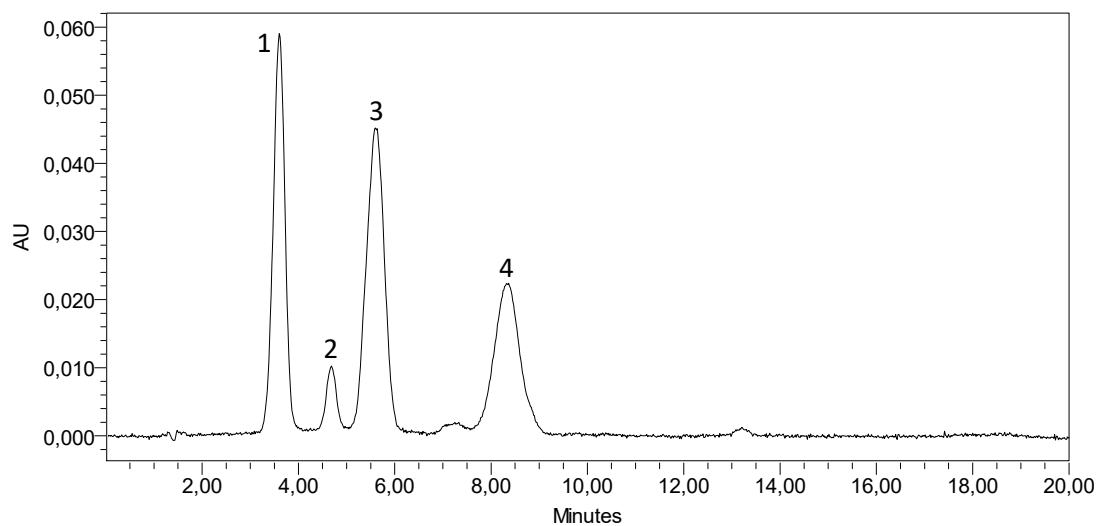

**Figure S2.** Chromatogram obtained from jamun-berry (*Syzygium cumini*, SC) samples. Peak 1: Delphinidin-3,5-O- diglucoside; peak 2: Cyanidin-3,5-O diglucoside; peak 3: Petunidin-3,5-O- diglucoside; peak 4: Malvidin-3,5-O- diglucoside.

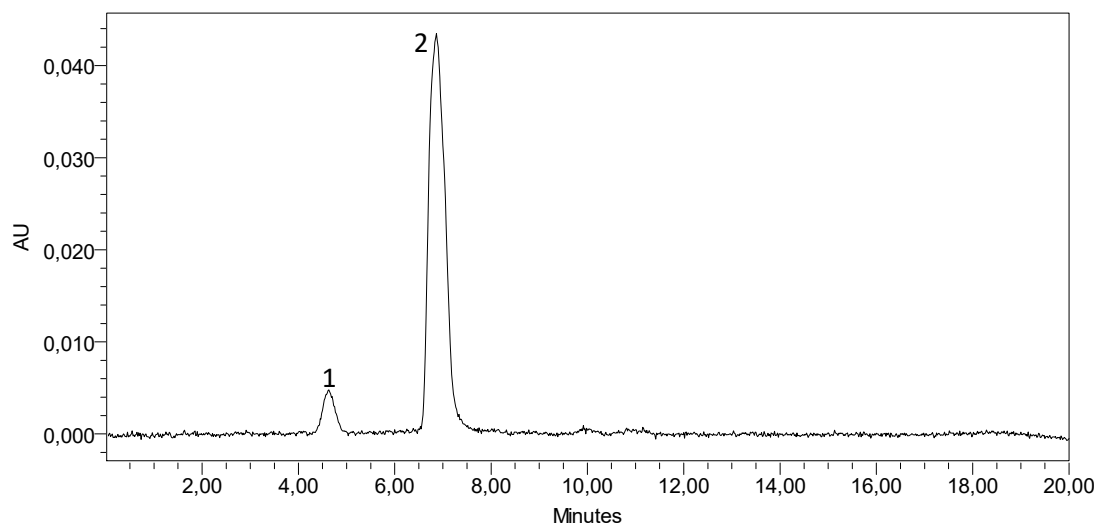

**Figure S3.** Chromatogram obtained from malay-apple (*Syzygium malaccense*, SM) samples. Peak 1: Cyanidin-3,5-O diglucoside; peak 2: Cyanidin-3-O- glucoside
